# Supplementary material for: Prediction of Potential Distribution Area of Two Parapatric Species in Triosteum under Climate Change
Source: MDPI journal article supplement (doi:10.3390/su15065604), 2023-03-22
Supplement: s1 [file s1]

**Table S1.** Distribution data from field investigation

| Specie          | latitude      | longitude     |
|-----------------|---------------|---------------|
| T. Pinnatifidum | 32°48'46"     | 100°49'08"    |
| T. Pinnatifidum | 32°47'35"     | 100°56'14"    |
| T. Pinnatifidum | 32°19'16"     | 100°49'50"    |
| T. Pinnatifidum | 32°35'55"     | 101°14'26"    |
| T. Pinnatifidum | 36°55'07.5"   | 102°22'01.1"  |
| T. Pinnatifidum | 36°20'24"     | 101°54'58.5"  |
| T. Pinnatifidum | 36°41'16.9"   | 102°24'09.3"  |
| T. Pinnatifidum | 31°39'48.6"   | 103°56'13.9"  |
| T. Pinnatifidum | 31°37'29"     | 100°43'12"    |
| T. Pinnatifidum | 35°18'01"     | 101°51'28.43" |
| T. Pinnatifidum | 34°50'34.02"  | 103°26'43.68" |
| T. Pinnatifidum | 32°52'43.7"   | 104°10'28.65" |
| T. Pinnatifidum | 33°17'104.46" | 103°48'51.34" |
| T. Pinnatifidum | 30°51.510'"   | 102°58.367'"  |
| T. Pinnatifidum | 33°40'50.6"   | 103°27'49.1"  |
| T. Pinnatifidum | 32°07'51.8"   | 101°00'08.3"  |
| T. Pinnatifidum | 34°00'40"     | 107°48'34"    |
| T. Pinnatifidum | 35°30'46"     | 111°56'02"    |
| T. Pinnatifidum | 37°50'45"     | 111°28'02"    |
| T. himalayanum  | 31°50'15.3"   | 102°41'11.4"  |
| T. himalayanum  | 27°2'41.7"    | 100°11'54.1"  |
| T. himalayanum  | 27°37'57.6"   | 99°40'29.9"   |
| T. himalayanum  | 30°52'24.4"   | 101°14'37.7"  |
| T. himalayanum  | 30°32'07.5"   | 101°35'27.2"  |
| T. himalayanum  | 27°54'19.8"   | 99°38'09.9"   |
| T. himalayanum  | 31°10'11"     | 100°53'00"    |
| T. himalayanum  | 28°05'22.34"  | 91°05'9.93"   |
| T. himalayanum  | 27°44'37.88"  | 88°58'01.14"  |
| T. himalayanum  | 27°37'22.79"  | 89°06'31.67"  |
| T. himalayanum  | 27°41'8.82"   | 101°13'23.52" |
| T. himalayanum  | 27°53'46.95"  | 99°43'37.62"  |
| T. himalayanum  | 29°41'39.0"   | 94°43'34.3"   |
| T. himalayanum  | 27°48'28.5"   | 91°59'29.7"   |
| T. himalayanum  | 27°37'55.6"   | 89°02'07"     |
| T. himalayanum  | 27°25'44"     | 88°55'28"     |
| T. himalayanum  | 32°16'47"     | 109°03'47"    |
| T. himalayanum  | 31°39'48.6"   | 103°56'13.9"  |
| T. himalayanum  | 30°32'56"     | 101°37'33.2"  |
| T. himalayanum  | 31°08'40.6"   | 100°54'13"    |
| T. himalayanum  | 30°51.510'"   | 102°58.367'"  |
| T. himalayanum  | 27°46'43.05"  | 91°58'40.3"   |
